# Supplementary material for: Magnetic mesoporous TiO2 microspheres for sustainable arsenate removal from acidic environments
Source: Royal Society of Chemistry journal article supplement (doi:10.1039/c8qi00588e), 2018-01-01
Supplement: c8qi00588e1.pdf [file c8qi00588e1.pdf]

## Electronic Supplementary Information

### **Magnetic mesoporous TiO<sub>2</sub> microspheres for sustainable arsenate removal from acidic environment**

Yujuan Zhao,<sup>a</sup> Changyao Wang,<sup>a</sup> Shuai Wang,<sup>a</sup> Chun Wang,<sup>a</sup> Yupu Liu,<sup>a</sup> Areej Abdulkareem Al-Khalaf,<sup>b</sup> Wael N. Hozzein,<sup>c,d</sup> Linlin Duan,<sup>a</sup> Wei Li<sup>\*a</sup> and Dongyuan Zhao<sup>\*a</sup>

<sup>a</sup> Department of Chemistry, Laboratory of Advanced Materials, Shanghai Key Lab of Molecular Catalysis and Innovative Materials, *i*ChEM and State Key Laboratory of Molecular Engineering of Polymers, Fudan University, Shanghai 200433, P. R. China.

<sup>b</sup> Biology Department, College of Sciences, Princess Nourah Bint Abdulrahman University, Riyadh, Saudi Arabia

<sup>c</sup> Bioproducts Research Chair, Zoology Department, College of Science, King Saud University, Riyadh 11451, Saudi Arabia

<sup>d</sup> Botany and Microbiology Department, Faculty of Science, Beni-Suef University, Beni-Suef, Egypt.

E-mail: dyzhao@fudan.edu.cn, weilichem@fudan.edu.cn

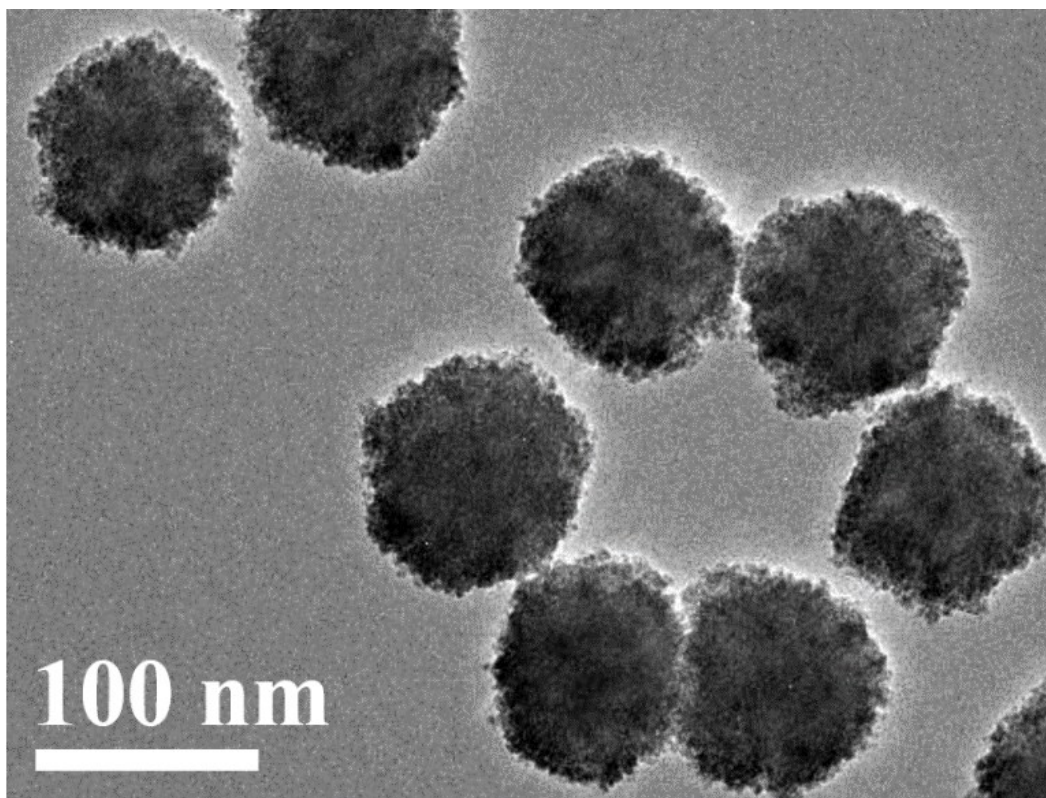

**Fig. S1** The TEM image of the magnetite  $\text{Fe}_3\text{O}_4$  nanoparticles prepared by a modified solvothermal reaction by aging a glycol solution of  $\text{FeCl}_3 \cdot 6\text{H}_2\text{O}$  (3.25 g), trisodium citrate (1.3 g), and sodium acetate (6.0 g) at 200 °C for 10 h.

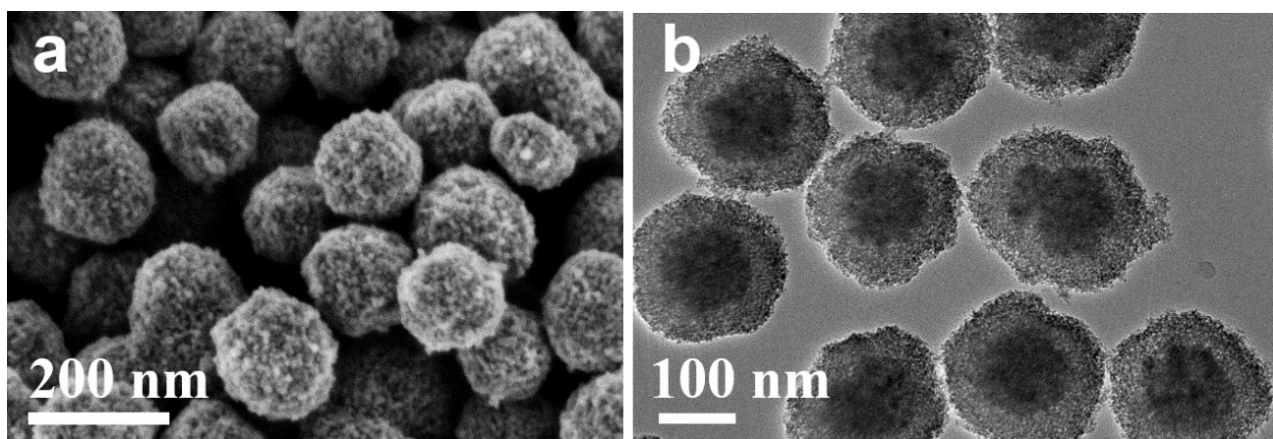

**Fig. S2** SEM (a) and TEM (b) images of the core-shell structured Fe<sub>3</sub>O<sub>4</sub>@mTiO<sub>2</sub> microspheres prepared through the versatile kinetics-controlled coating method followed by calcining at 200 °C for 3 h in air.

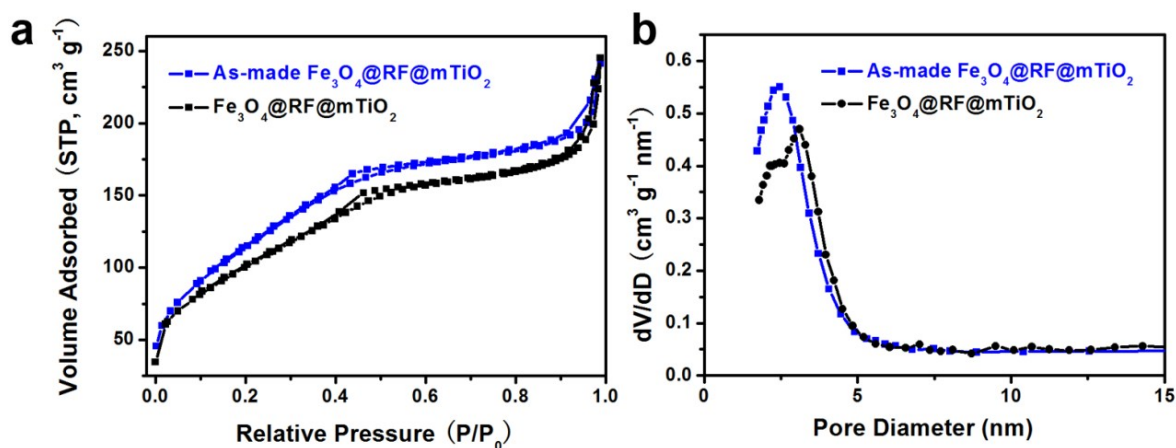

**Fig. S3** The nitrogen adsorption/desorption isotherms (a) and the corresponding pore size distribution curves (b) of the as-made  $\text{Fe}_3\text{O}_4@\text{RF}@\text{mTiO}_2$  and calcined  $\text{Fe}_3\text{O}_4@\text{RF}@\text{mTiO}_2$  microspheres. The as-made  $\text{Fe}_3\text{O}_4@\text{RF}@\text{mTiO}_2$  microspheres were obtained by the successive sol-gel coating method and the versatile kinetics-controlled coating method. The  $\text{Fe}_3\text{O}_4@\text{RF}@\text{mTiO}_2$  microspheres were fabricated by calcining the as-made  $\text{Fe}_3\text{O}_4@\text{RF}@\text{mTiO}_2$  microspheres at 200 °C for 3 h in air.

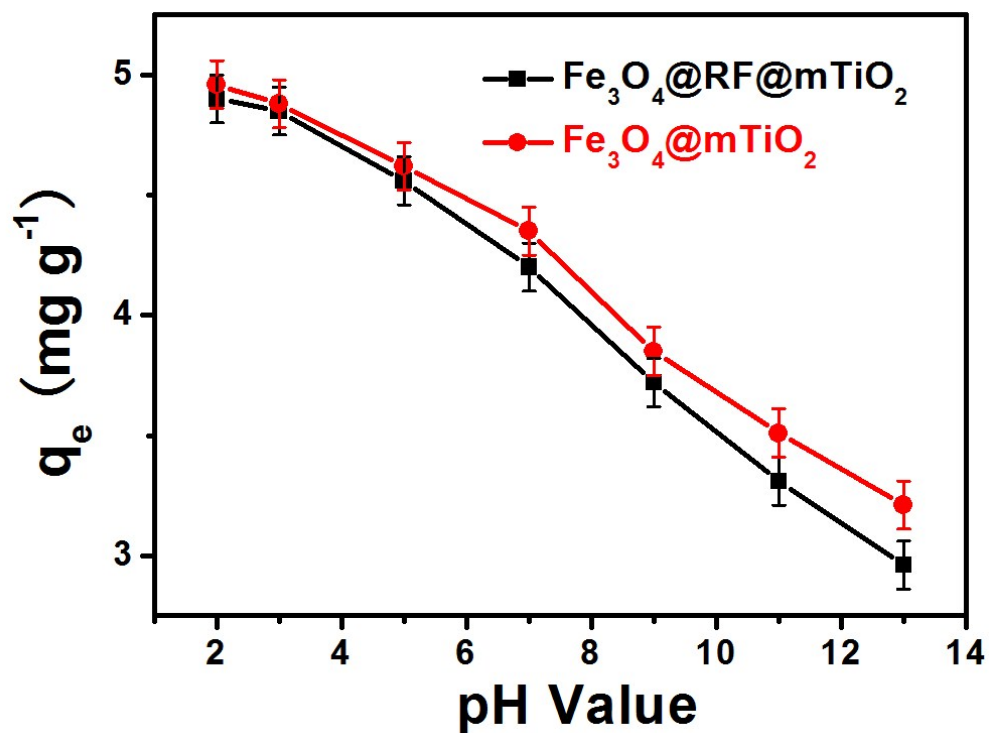

**Fig. S4** The influence of pH values on  $\text{As}^{\text{V}}$  adsorption for the core-shell structured  $\text{Fe}_3\text{O}_4@\text{RF}@\text{mTiO}_2$  and  $\text{Fe}_3\text{O}_4@\text{mTiO}_2$  microspheres. The adsorption amounts of  $\text{Fe}_3\text{O}_4@\text{RF}@\text{mTiO}_2$  and  $\text{Fe}_3\text{O}_4@\text{mTiO}_2$  nano-adsorbents decreased with the increase of the pH values. The  $\text{Fe}_3\text{O}_4@\text{RF}@\text{mTiO}_2$  and  $\text{Fe}_3\text{O}_4@\text{mTiO}_2$  microspheres were fabricated by calcining the corresponding as-made  $\text{Fe}_3\text{O}_4@\text{RF}@\text{mTiO}_2$  and as-made  $\text{Fe}_3\text{O}_4@\text{mTiO}_2$  microspheres at 200 °C for 3 h in air, respectively.

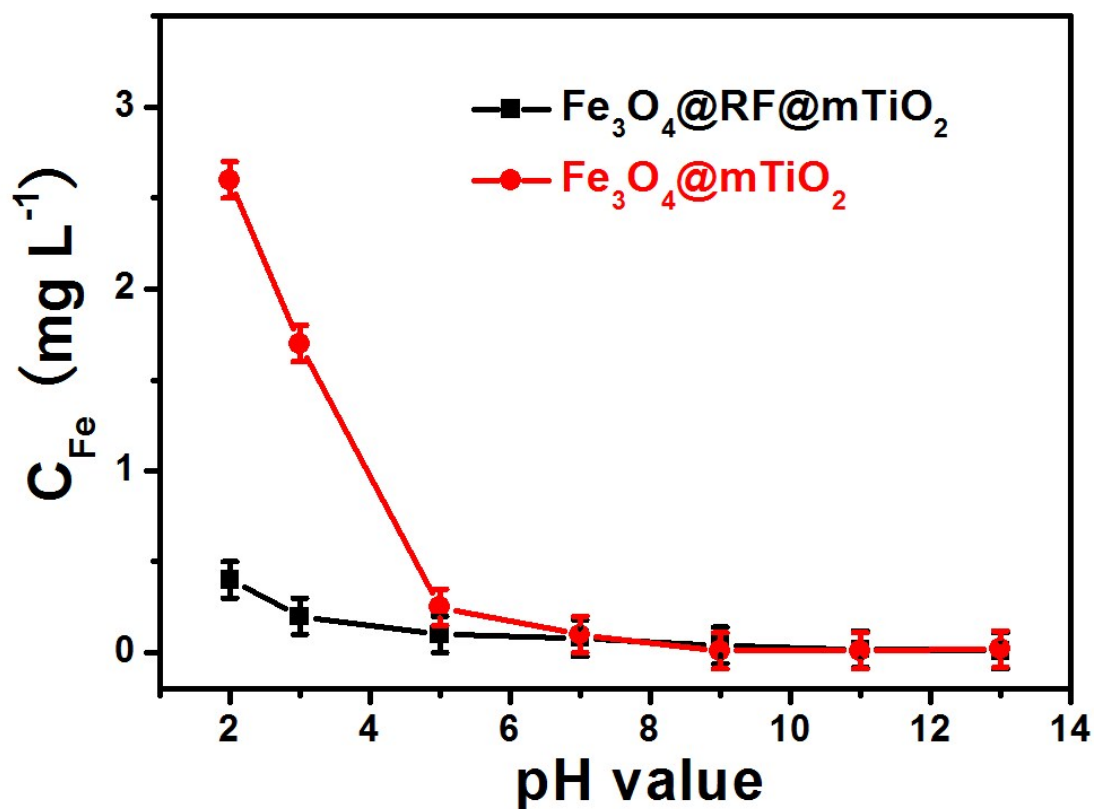

**Fig. S5** The concentration of iron ions in the residual solution after  $\text{As}^{\text{V}}$  adsorption by the  $\text{Fe}_3\text{O}_4@\text{RF}@\text{mTiO}_2$  and  $\text{Fe}_3\text{O}_4@\text{mTiO}_2$  microspheres within different pH values (the initial arsenate concentration was  $5 \text{ mg} \cdot \text{L}^{-1}$ ). The  $\text{Fe}_3\text{O}_4@\text{RF}@\text{mTiO}_2$  and  $\text{Fe}_3\text{O}_4@\text{mTiO}_2$  microspheres were fabricated by calcining the corresponding as-made  $\text{Fe}_3\text{O}_4@\text{RF}@\text{mTiO}_2$  and as-made  $\text{Fe}_3\text{O}_4@\text{mTiO}_2$  microspheres at  $200^\circ\text{C}$  for 3 h in air, respectively.

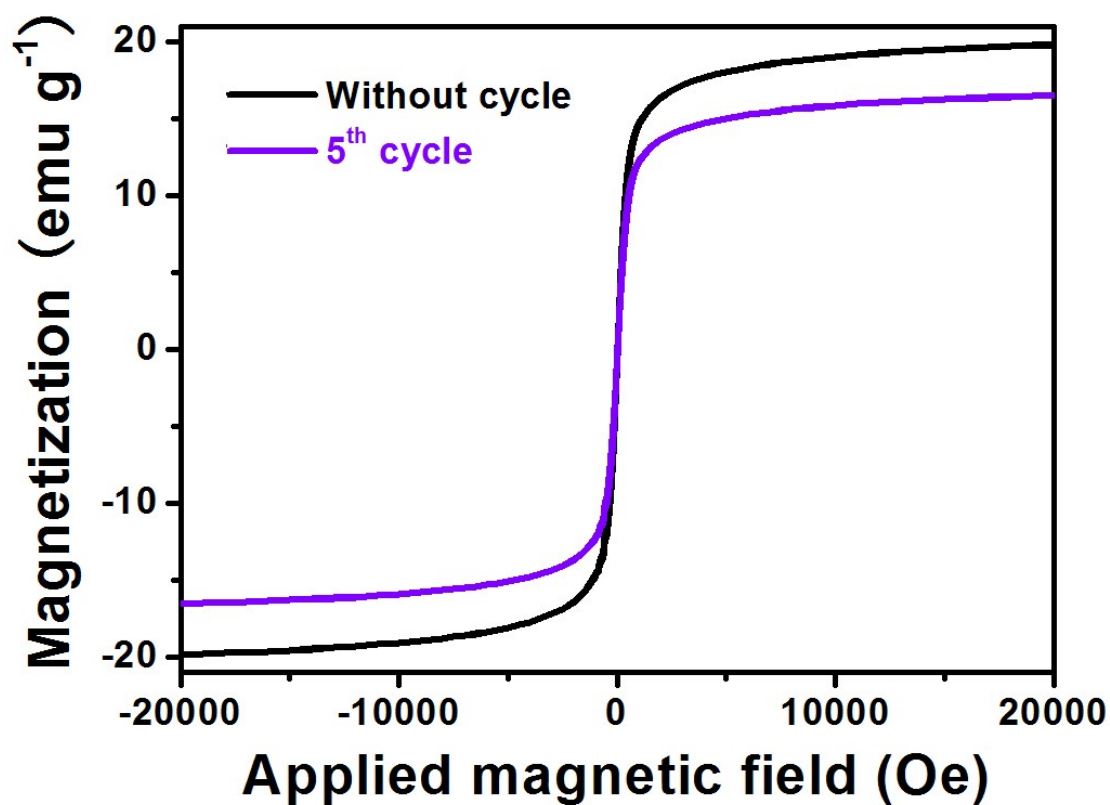

**Fig. S6** The magnetic hysteresis loops of the multilayer core-shell structured Fe<sub>3</sub>O<sub>4</sub>@RF@mTiO<sub>2</sub> microspheres before As<sup>V</sup> adsorption and after five As<sup>V</sup> adsorption cycles.

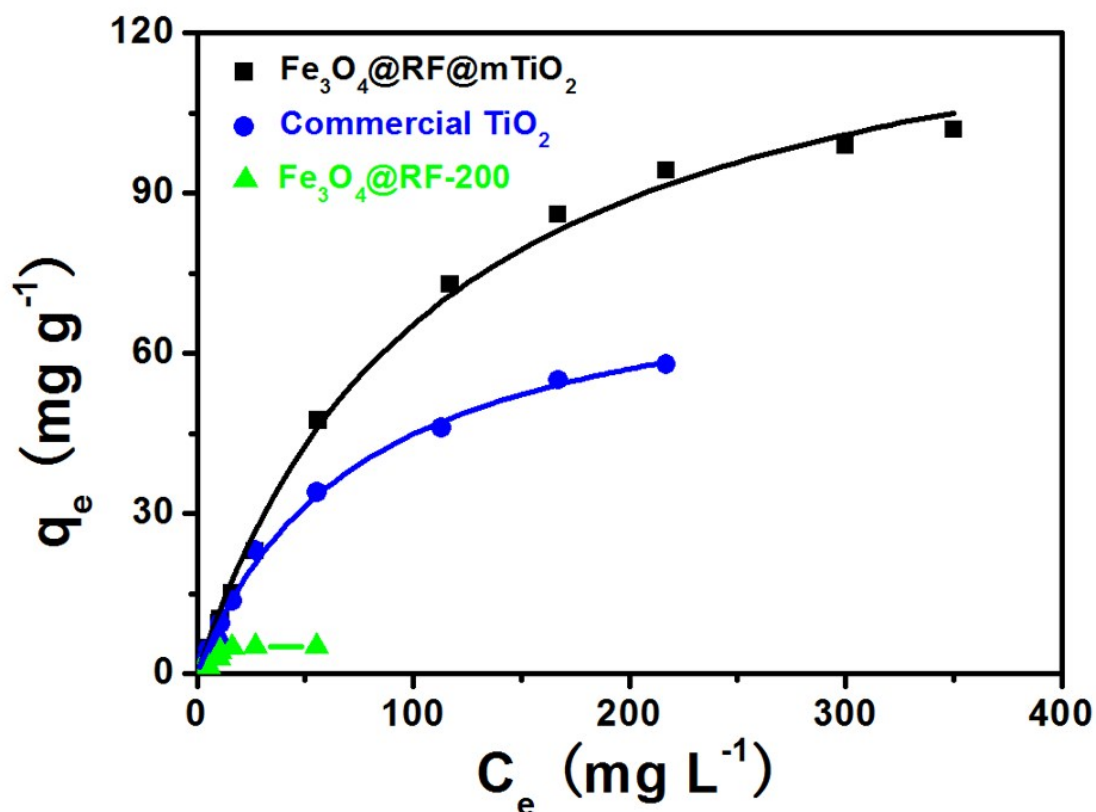

**Fig. S7** Adsorption isotherms of  $\text{As}^{\text{V}}$  on the multilayer core-shell  $\text{Fe}_3\text{O}_4@\text{RF}@m\text{TiO}_2$  microspheres, commercial  $\text{TiO}_2$ , and  $\text{Fe}_3\text{O}_4@\text{RF}-200$  microspheres at 25 °C, suggesting the better  $\text{As}^{\text{V}}$  adsorption performance than the commercial  $\text{TiO}_2$  and  $\text{Fe}_3\text{O}_4@\text{RF}-200$  microspheres. Typically, 20 mg of adsorbents were dissolved into 20 mL of  $\text{As}^{\text{V}}$  solution with different concentrations (1–350  $\text{mg}\cdot\text{L}^{-1}$ ). The  $\text{Fe}_3\text{O}_4@\text{RF}-200$  microspheres were produced by calcining the  $\text{Fe}_3\text{O}_4@\text{RF}$  microspheres at 200 °C in air for 3 h.



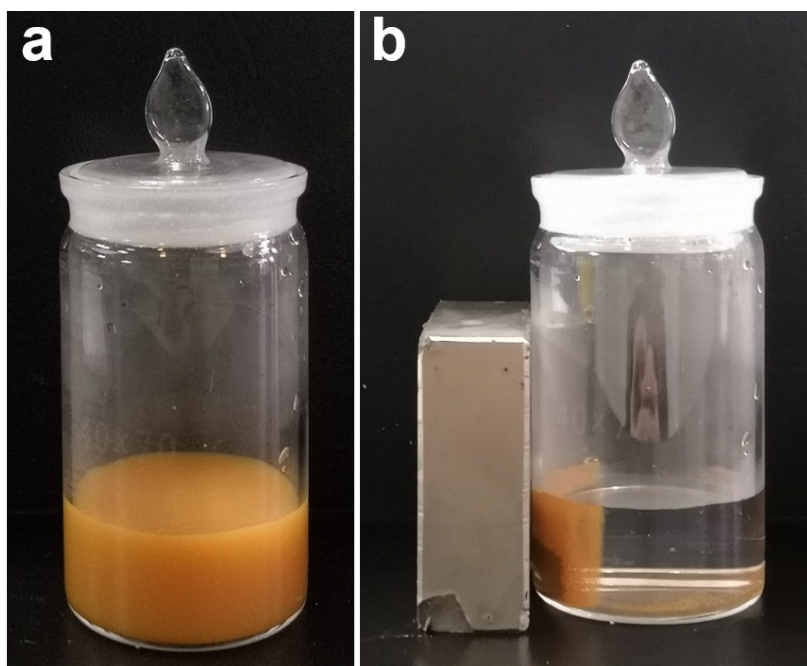

**Fig. S8** The optical photos of (a) 20 mg of the  $\text{Fe}_3\text{O}_4@\text{RF@mTiO}_2$  microspheres dispersed in 20 mL of deionized water by ultrasound and (b) separated by a magnet after 10 minutes.

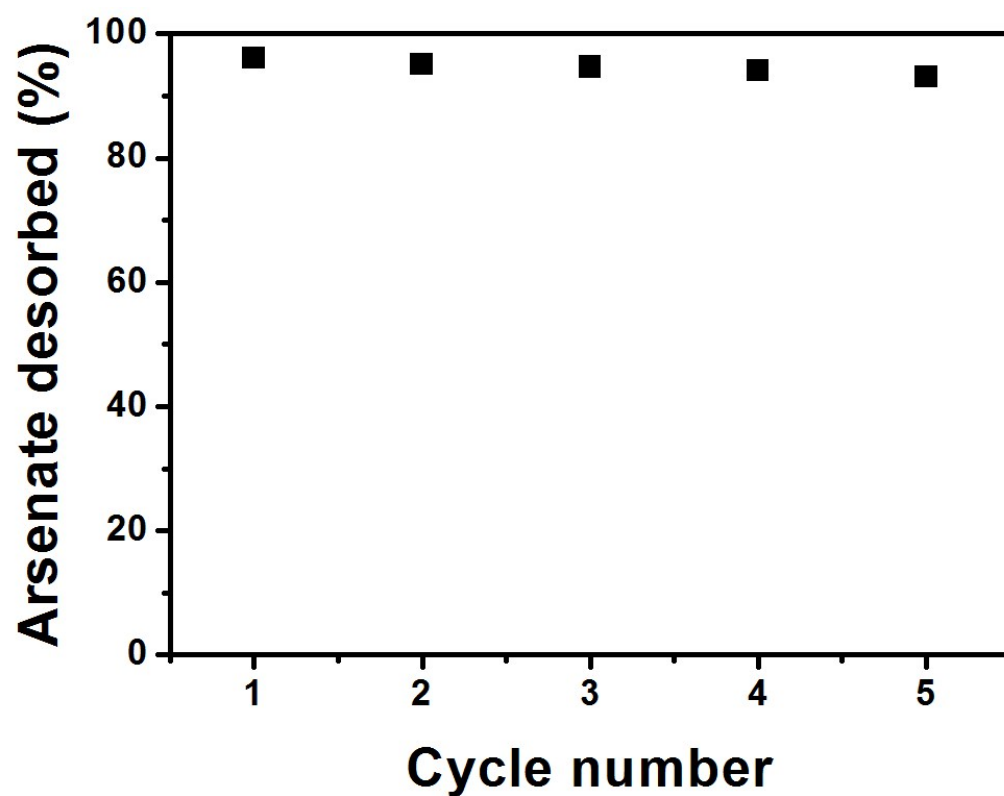

**Fig. S9** The  $\text{As}^{\text{V}}$  desorption curves of the  $\text{Fe}_3\text{O}_4@\text{RF}@\text{mTiO}_2$  microspheres. The desorption processes were conducted by using 0.5 M NaOH solution.

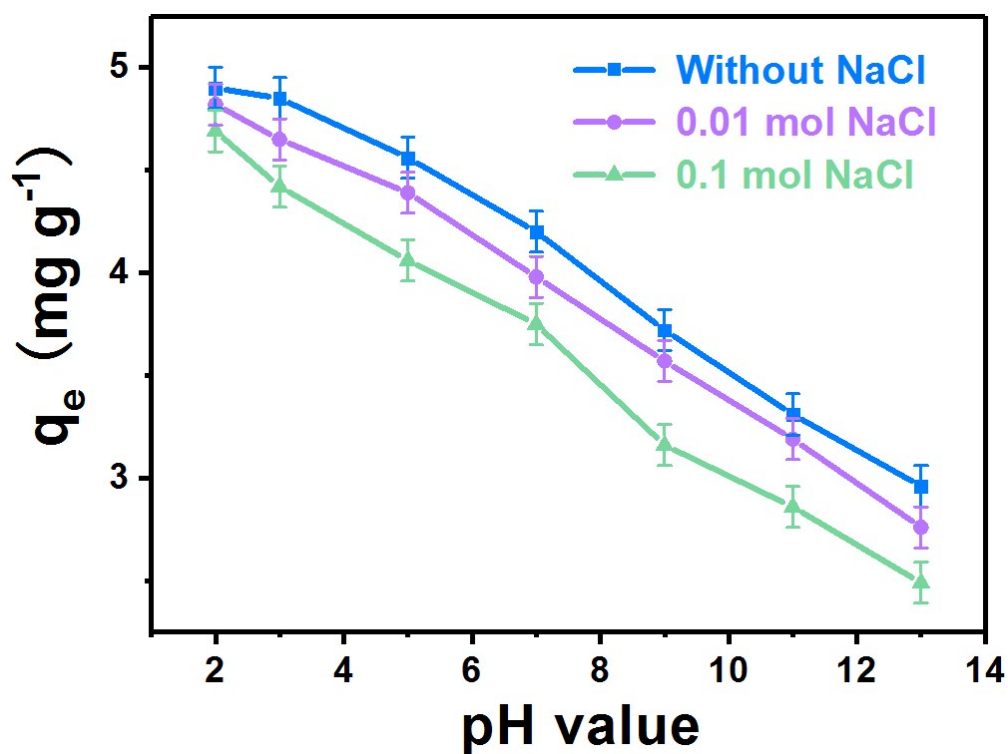

**Fig. S10** Effect of ion strength on  $\text{As}^{\text{V}}$  adsorption by the multilayer  $\text{Fe}_3\text{O}_4@\text{RF}@\text{mTiO}_2$  microspheres. The increased concentration of NaCl induces a competition effect with  $\text{As}^{\text{V}}$  removal, suggesting an electrostatic interaction between  $\text{As}^{\text{V}}$  and  $\text{TiO}_2$  shells. The multilayer  $\text{Fe}_3\text{O}_4@\text{RF}@\text{mTiO}_2$  microspheres were fabricated by calcining the as-made  $\text{Fe}_3\text{O}_4@\text{RF}@\text{mTiO}_2$  microspheres at 200 °C for 3 h in air.

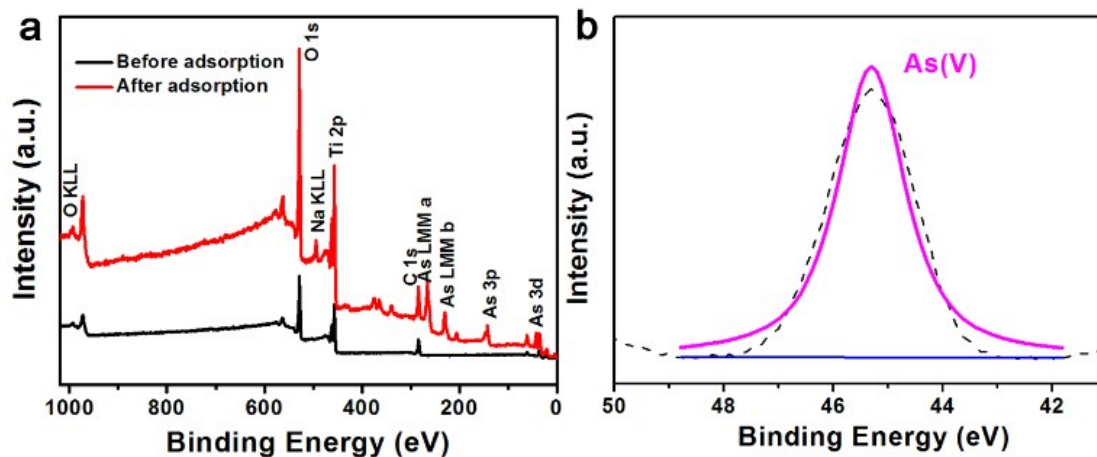

**Fig. S11** (a) XPS wide scan spectra of the multilayer  $\text{Fe}_3\text{O}_4@\text{RF}@\text{mTiO}_2$  microspheres before and after  $\text{As}^{\text{V}}$  adsorption. (b) High resolution  $\text{As}3\text{d}$  spectrum of the  $\text{Fe}_3\text{O}_4@\text{RF}@\text{mTiO}_2$  microspheres after  $\text{As}^{\text{V}}$  adsorption, indicating the presence of  $\text{As}^{\text{V}}$  on the surface of the microspheres after adsorption. The multilayer  $\text{Fe}_3\text{O}_4@\text{RF}@\text{mTiO}_2$  microspheres were fabricated by calcining the as-made  $\text{Fe}_3\text{O}_4@\text{RF}@\text{mTiO}_2$  microspheres at 200 °C for 3 h in air.

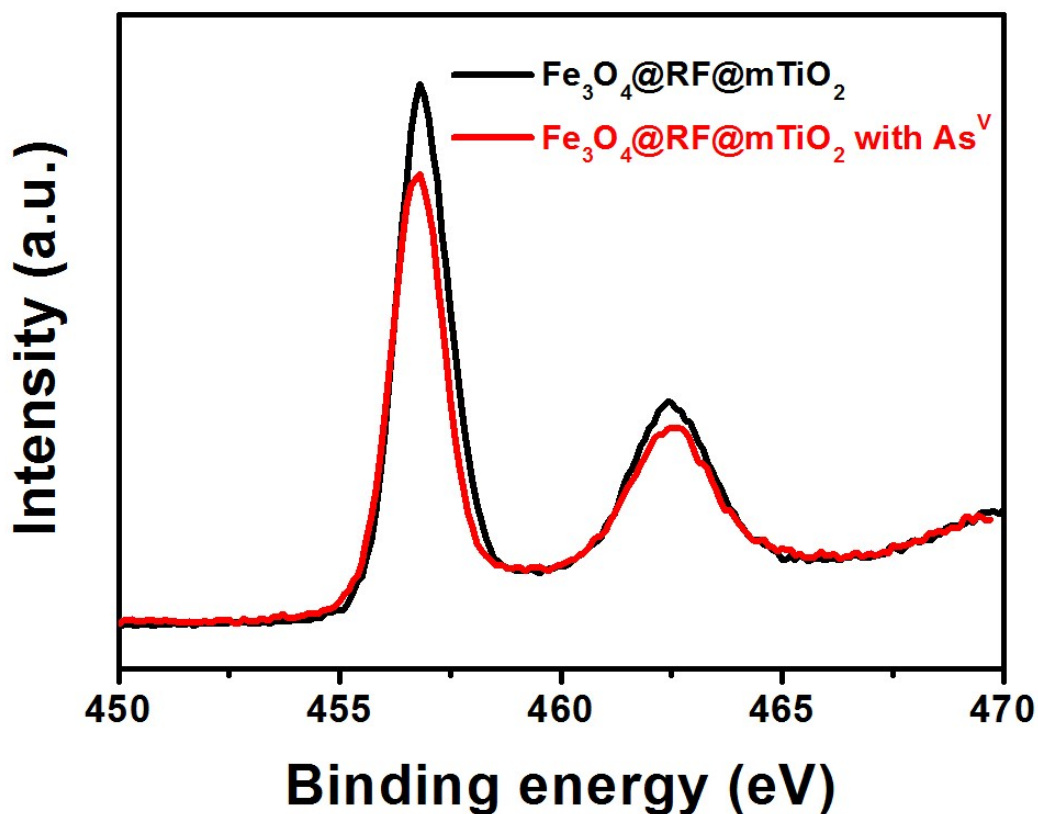

**Fig. S12** Ti2p spectra of the multilayer Fe<sub>3</sub>O<sub>4</sub>@RF@mTiO<sub>2</sub> microspheres before and after arsenate adsorption. It can be found that the intensity of Ti2p bands slightly decreases after arsenate adsorption, which can be ascribed to the formation of surface coordination complex, thus shielding the surface exposure of Ti. The multilayer Fe<sub>3</sub>O<sub>4</sub>@RF@mTiO<sub>2</sub> microspheres were fabricated by calcining the as-made Fe<sub>3</sub>O<sub>4</sub>@RF@mTiO<sub>2</sub> microspheres at 200 °C for 3 h in air.

**Table S1** Textural properties of the core-shell structured  $\text{Fe}_3\text{O}_4@\text{RF@mTiO}_2$  and  $\text{Fe}_3\text{O}_4@\text{mTiO}_2$  microspheres, their maximum adsorption capacities ( $q_{\text{max}}$ ), and the rate constants of the pseudo-second-order model.

| Samples                                  | $S_{\text{BET}}$<br>( $\text{m}^2\cdot\text{g}^{-1}$ ) <sup>a</sup> | $V_t$<br>( $\text{cm}^3\cdot\text{g}^{-1}$ ) <sup>b</sup> | Pore<br>size<br>(nm) <sup>c</sup> | $q_{\text{max}}$<br>( $\text{mg}\cdot\text{g}^{-1}$ ) <sup>d</sup> | $R_1^2$<br><sup>e</sup> | k<br>( $\text{g}\cdot\text{mg}^{-1}\cdot\text{h}^{-1}$ ) <sup>f</sup> | $R_2^2$<br><sup>g</sup> |
|------------------------------------------|---------------------------------------------------------------------|-----------------------------------------------------------|-----------------------------------|--------------------------------------------------------------------|-------------------------|-----------------------------------------------------------------------|-------------------------|
| $\text{Fe}_3\text{O}_4@\text{RF@mTiO}_2$ | 337                                                                 | 0.38                                                      | 3.0                               | 138.6                                                              | 0.997                   | 1.16                                                                  | 0.999                   |
| $\text{Fe}_3\text{O}_4@\text{mTiO}_2$    | 351                                                                 | 0.42                                                      | 2.7                               | 143.2                                                              | 0.996                   | 1.37                                                                  | 0.999                   |

<sup>a</sup>,  $S_{\text{BET}}$  represents BET specific surface area obtained from  $\text{N}_2$  adsorption data in the  $p/p_0$  range from 0.05 to 0.20; <sup>b</sup>,  $V_t$  represents the total pore volume calculated from the adsorbed amount at  $p/p_0 = 0.99$ ; <sup>c</sup>, Pore size is determined by using the Barrett-Joyner-Halenda (BJH) model. <sup>d</sup>,  $q_{\text{max}}$  is the maximum adsorption capacity obtained by fitting with Langmuir model; <sup>e</sup>,  $R_1^2$  represents correlation coefficient related to the Langmuir mode; <sup>f</sup>, k is the rate constant related to the pseudo-second-order rate mode; <sup>g</sup>,  $R_2^2$  represent correlation coefficient related to the pseudo-second-order rate mode.
